# Supplementary figures and images for: Tunnelling conductance of vectorial porphyrin monolayers
Source: Royal Society of Chemistry journal article supplement (doi:10.1039/b802824a), 2008-01-01

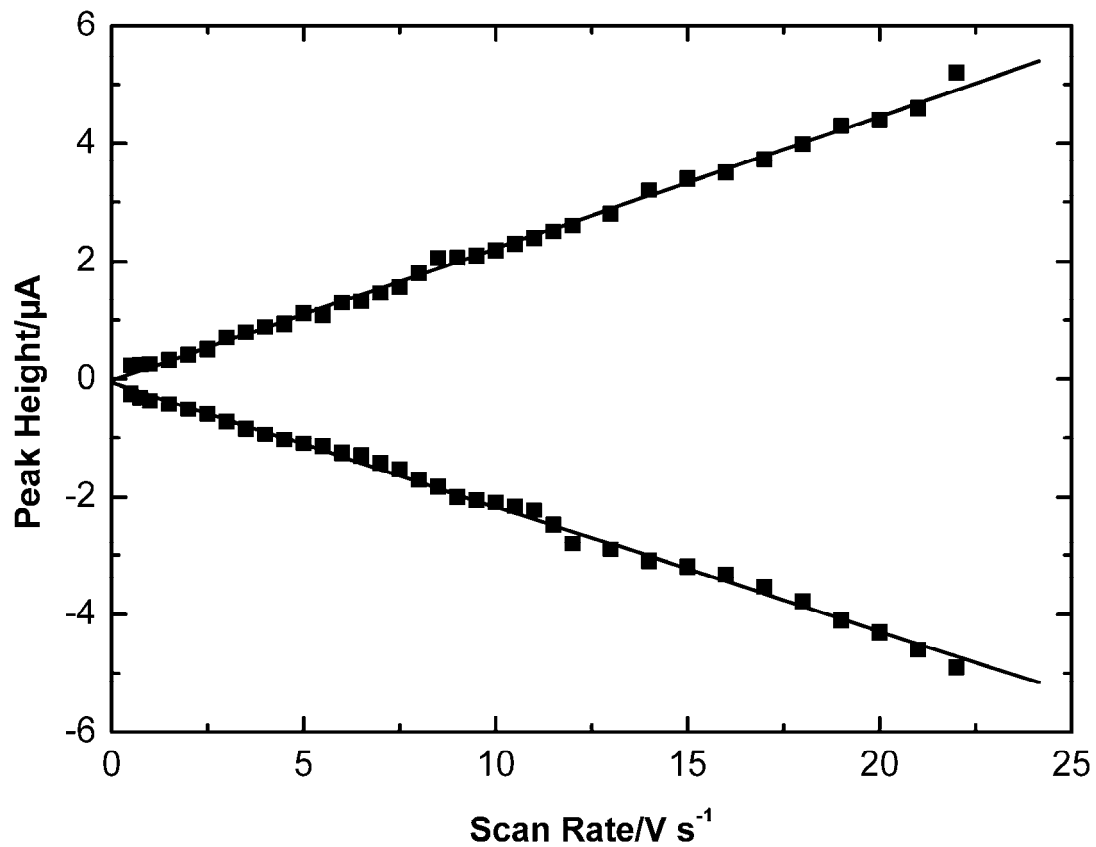

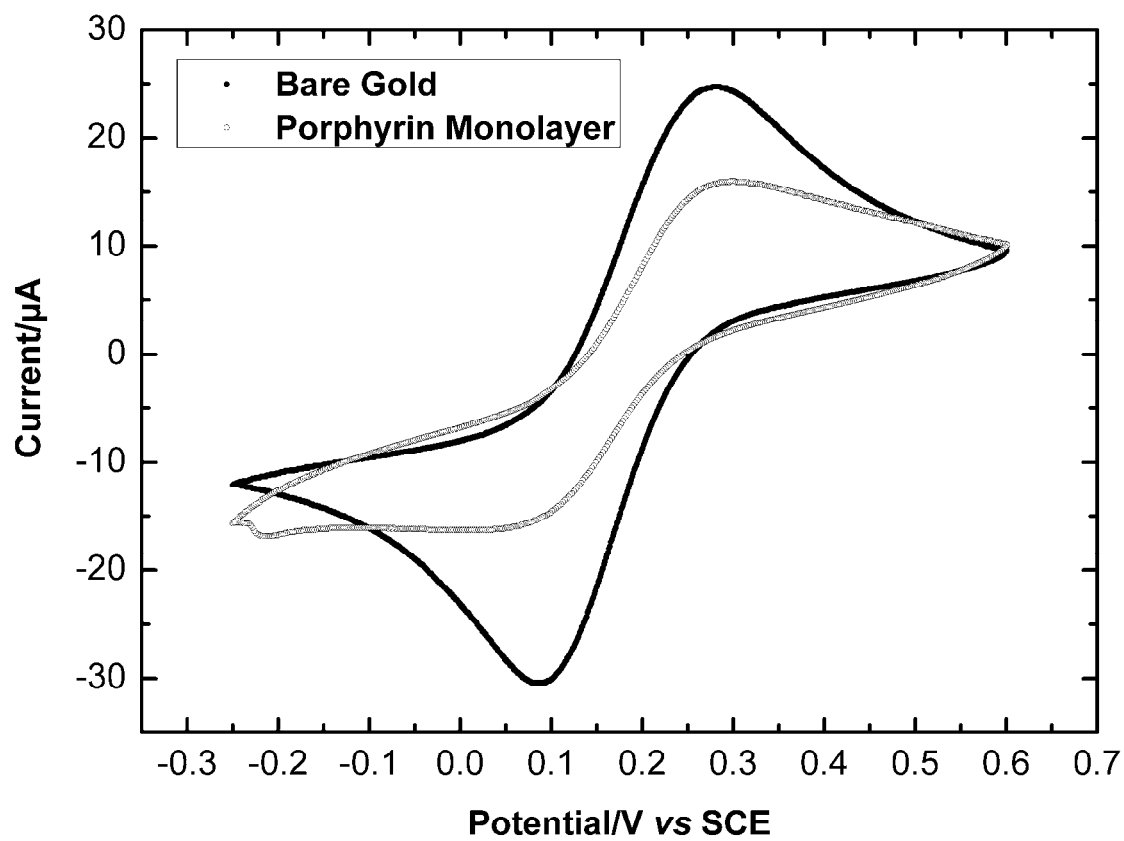

Supplement: b802824a.pdf [file b802824a.pdf]
